# Supplementary material for: The Convergent Validity of the electronic Frailty Index (eFI) with the Clinical Frailty Scale (CFS)
Source: PubMed Central journal article supplement (PMC7709678; doi:10.3390/geriatrics5040088), 2020-11-09
Supplement: geriatrics-05-00088-s001.pdf [file geriatrics-05-00088-s001.pdf]

Supplementary files

|                                   |                                |                          |
|-----------------------------------|--------------------------------|--------------------------|
| Activity limitation               | Hearing impairment             | Polypharmacy             |
| Anaemia and haematinic deficiency | Heart failure                  | Requirement for care     |
| Arthritis                         | Heart valve disease            | Respiratory disease      |
| Atrial fibrillation               | Housebound                     | Skin ulcer               |
| Cerebrovascular disease           | Hypertension                   | Sleep disturbance        |
| Chronic kidney disease            | Hypotension/syncope            | Social vulnerability     |
| Diabetes                          | Memory and cognitive problems  | Thyroid disease          |
| Dizziness                         | Mobility and transfer problems | Urinary incontinence     |
| Dyspnoea                          | Osteoporosis                   | Urinary system disease   |
| Falls                             | Parkinsonism and tremor        | Visual impairment        |
| Foot problems                     | Peptic ulcer                   | Weight loss and anorexia |
| Fragility fracture                | Peripheral vascular disease    | Ischaemic heart disease  |

Table 1. eFI list of 36 health deficits [11]

### Clinical Frailty Scale\*

 **1 Very Fit** – People who are robust, active, energetic and motivated. These people commonly exercise regularly. They are among the fittest for their age.

---

 **2 Well** – People who have **no active disease symptoms** but are less fit than category 1. Often, they exercise or are very **active occasionally**, e.g. seasonally.

---

 **3 Managing Well** – People whose **medical problems are well controlled**, but are **not regularly active** beyond routine walking.

---

 **4 Vulnerable** – While **not dependent** on others for daily help, often **symptoms limit activities**. A common complaint is being “slowed up”, and/or being tired during the day.

---

 **5 Mildly Frail** – These people often have **more evident slowing**, and need help in **high order IADLs** (finances, transportation, heavy housework, medications). Typically, mild frailty progressively impairs shopping and walking outside alone, meal preparation and housework.

---

 **6 Moderately Frail** – People need help with **all outside activities** and with **keeping house**. Inside, they often have problems with stairs and need **help with bathing** and might need minimal assistance (cuing, standby) with dressing.

 **7 Severely Frail** – **Completely dependent for personal care**, from whatever cause (physical or cognitive). Even so, they seem stable and not at high risk of dying (within ~ 6 months).

---

 **8 Very Severely Frail** – Completely dependent, approaching the end of life. Typically, they could not recover even from a minor illness.

---

 **9. Terminally Ill** - Approaching the end of life. This category applies to people with a **life expectancy <6 months**, who are **not otherwise evidently frail**.

**Scoring frailty in people with dementia**

The degree of frailty corresponds to the degree of dementia. Common **symptoms in mild dementia** include forgetting the details of a recent event, though still remembering the event itself, repeating the same question/story and social withdrawal.

In **moderate dementia**, recent memory is very impaired, even though they seemingly can remember their past life events well. They can do personal care with prompting.

In **severe dementia**, they cannot do personal care without help.

\* 1. Canadian Study on Health & Aging, Revised 2008.  
2. K. Rockwood et al. A global clinical measure of fitness and frailty in elderly people. CMAJ 2005;173:489-495.

© 2009, Version 1.2\_EN. All rights reserved. Geriatric Medicine Research, Dalhousie University, Halifax, Canada. Permission granted to copy for research and educational purposes only.



Figure 1. Clinical frailty scale (CFS) [12]
